# Supplementary material
Source: publisher figshare collection journal article supplement (https://plos.figshare.com/articles/dataset/_/3499559)
Supplement: Supplementary file [file 1]

**Table S2 : RichMind results for case study 2 using 7 functional brain network reported in [1] as annotations ; Class abbreviations: VN=visual network, SMN=sensori-motor network, DAN=dorsal attention network, VAN=ventral attention network, DMN=default-mode network**

| Set          | Enriched class | HG-based q-values | Frequency Ratio | # Underlying voxels |
|--------------|----------------|-------------------|-----------------|---------------------|
| Arousal ISCs | VN             | 2.34E-08          | 3.3537          | 6280                |
| Arousal ISCs | SMN            | 3.54E-05          | 1.0911          | 1843                |
| Arousal ISCs | DAN            | 2.30E-08          | 2.9566          | 3882                |
| Arousal ISCs | VAN            | 2.38E-08          | 1.7254          | 2047                |
| Valence ICSs | DAN            | 1.02E-08          | 1.3273          | 784                 |
| Valence ICSs | VAN            | 2.30E-08          | 1.8756          | 1001                |
| Valence ICSs | DMN            | 2.30E-08          | 2.5176          | 2888                |

## References

1. Yeo BT, Krienen FM, Sepulcre J, Sabuncu MR, Lashkari D, et al. (2011) The organization of the human cerebral cortex estimated by intrinsic functional connectivity. Journal of Neurophysiology 106: 1125-1165.
