# Supplementary material
Source: publisher figshare collection journal article supplement (https://plos.figshare.com/articles/dataset/_/3499559)
Supplement: Supplementary file [file 1]

**Table S1 : RichMind results for case study 1 using 7 functional brain network reported in [1] as annotations ; Class abbreviations: VN=visual network, SMN=sensori-motor network, DMN=default-mode network, FPCN=fronto-parietal control network**

| Enriched inter-class connection | HG- based q-value | Permutation based q-value | Frequency ratio | # Underlying connections |
|---------------------------------|-------------------|---------------------------|-----------------|--------------------------|
| VN-VN                           | 2.46E-08          | 0.3192                    | 4.6958          | 29                       |
| DMN-FPCN                        | 1                 | <0.0075                   | 0.9225          | 16                       |
| SMN-VN                          | 0                 | <0.0075                   | 4.0277          | 49                       |

## References

1. Yeo BT, Krienen FM, Sepulcre J, Sabuncu MR, Lashkari D, et al. (2011) The organization of the human cerebral cortex estimated by intrinsic functional connectivity. *Journal of Neurophysiology* 106: 1125-1165.
